# Supplementary material for: Cytoprotective role of the fatty acid binding protein 4 against oxidative and endoplasmic reticulum stress in 3T3-L1 adipocytes
Source: PubMed Central journal article supplement — FEBS Open Bio. 2014 Jul 3;4:602–10. doi: 10.1016/j.fob.2014.06.008 (PMC4141204; doi:10.1016/j.fob.2014.06.008), 2014-07-03
Supplement: mmc1.pdf [file mmc1.pdf]

## Supplementary Tables

**Table S1. Primers utilized for RT-PCR analyses.**

| Genes         | Forward primers (5'-3')  | Reverse primers (5'-3') |
|---------------|--------------------------|-------------------------|
| <i>Ern1</i>   | cctcccagatccaatgatgg     | caaaggccgatgacaaagtct   |
| <i>Fabp4</i>  | tcaccatcccgtcagagagtactt | acattccaccaccagcttgca   |
| <i>Gapdh</i>  | tgacctgcccacgccttg       | catcaccatcttcaggagcg    |
| <i>Ormdl3</i> | ccaaccttatccacaacctgg    | gaccccgtagtccatctgc     |
| <i>Ssr1</i>   | gaaccacagatttggcagaa     | gaggcatctagcgattcaacaat |
| <i>Xbp1</i>   | ggctgtctggccttagaaga     | ctgtcaaatgacctccctg     |
| <i>Xbp1s</i>  | gagtccgcagcaggtg         | gtgtcagagtccatggga      |
| <i>Xbp1u</i>  | gactatgtgcacctctgcag     | ctgggagttcctccagacta    |

All primers utilized for RT-PCR analyses in this study are shown.

**Table S2. Antibodies utilized for Western blotting.**

|                      | Vender                    | Clone (for mAb) | Conjugated             |
|----------------------|---------------------------|-----------------|------------------------|
| Primary antibodies   |                           |                 |                        |
| FABP4                | Cell Signaling Technology | D25B3           | -                      |
| GAPDH                | Cell Signaling Technology | D16H11          | -                      |
| GSTA4                | Abnova                    | -               | -                      |
| Secondary antibodies |                           |                 |                        |
| Goat anti-rabbit     | Cell Signaling Technology | -               | Horseradish peroxidase |

All primary and secondary antibodies utilized for Western blotting in this study are shown.

## Supplementary Figures

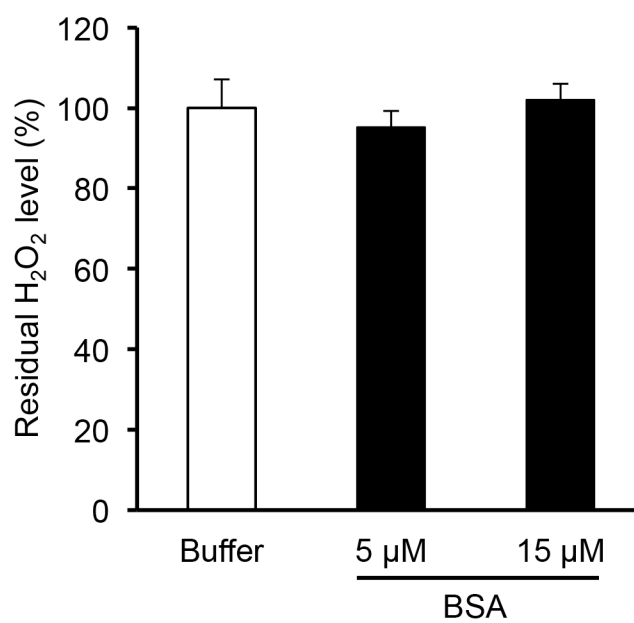

**Figure S1. No significant reduction of H<sub>2</sub>O<sub>2</sub> by BSA.**

5 or 15 μM of fatty acid-free BSA were incubated with H<sub>2</sub>O<sub>2</sub>, and then, the residual H<sub>2</sub>O<sub>2</sub> level was measured. The relative H<sub>2</sub>O<sub>2</sub> level in each sample against the negative control (buffer alone) was calculated. Data represent mean ± SD (n=3).

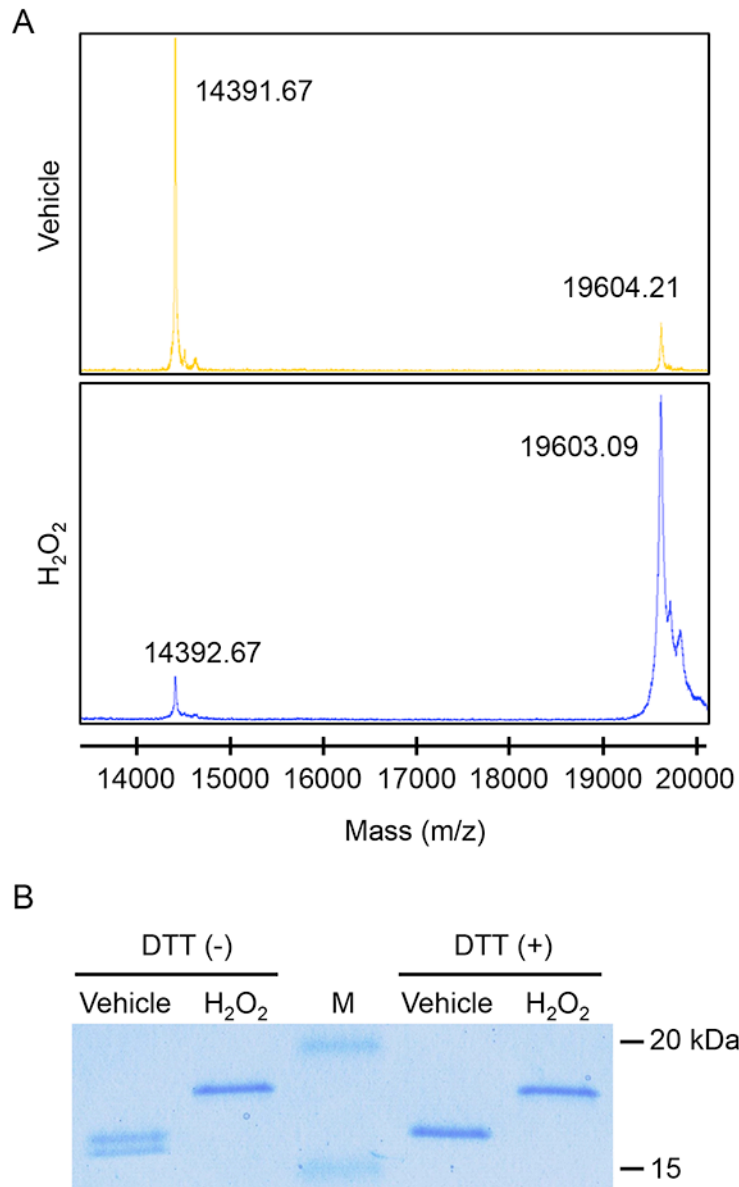

**Figure S2. Mass spectral and SDS-PAGE analyses of FABP4 protein treated with  $H_2O_2$ .**

(A) Mass spectral analysis. After incubation of FABP4 with  $H_2O_2$  or vehicle, the samples were analyzed by MALDI-TOF mass spectrometry. (B) SDS-PAGE. After incubation of FABP4 with  $H_2O_2$  or vehicle, the samples were subjected to 20% SDS-PAGE with or without 50 mM DTT. After electrophoresis, the gel was visualized by CBB staining.

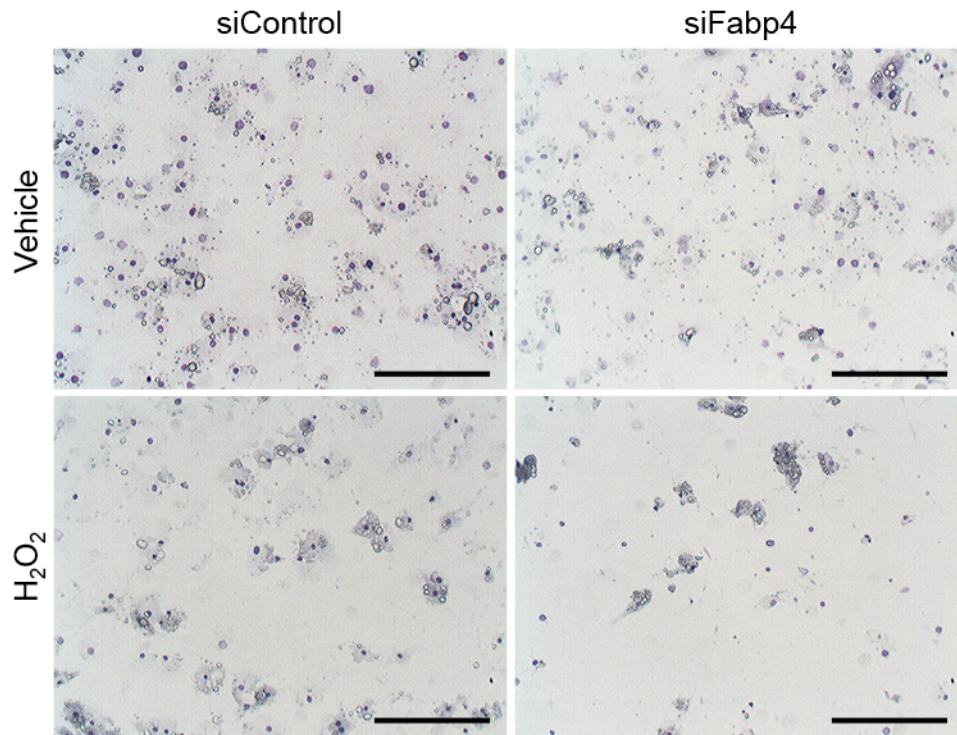

**Figure S3. Knockdown of FABP4 in the 3T3-L1 adipocytes reduced the resistance to oxidative stress induced by exposure of H<sub>2</sub>O<sub>2</sub>.**

At 48 h after siRNA transfection, the cells were exposed with 300 mM H<sub>2</sub>O<sub>2</sub> or vehicle for 1 h and then stained with 0.5% crystal violet. After washing, the cells were observed by bright field microscopy. A typical image of three independent experiments is shown. Scale bars represent 200  $\mu$ m.
